# Supplementary material for: Cerebrospinal fluid and plasma biomarker trajectories with increasing amyloid deposition in Alzheimer's disease
Source: PubMed Central journal article supplement (PMC6895602; doi:10.15252/emmm.201911170), 2019-11-11
Supplement: EMMM-11-e11170-s001.pdf [file EMMM-11-e11170-s001.pdf]

# Appendix

## Cerebrospinal fluid and plasma biomarker trajectories with increasing amyloid deposition in Alzheimer's disease

Sebastian Palmqvist, MD, PhD, Philip S. Insel, MSc, Erik Stomrud, MD, PhD, Shorena Janelidze, PhD, Henrik Zetterberg, MD, PhD, Britta Brix PhD, Udo Eichenlaub PhD, Jeffrey L. Dage, Xiyun Chai, MD, Kaj Blennow, MD, PhD Niklas Mattsson, MD, PhD, Oskar Hansson MD, PhD.

### Table of contents

Appendix Table S1

Appendix Table S2

Appendix Fig. S1

Appendix Fig. S2

## Appendix Tables

**Appendix Table S1. Inflection points (significant change of 2 SE) for plasma and CSF biomarkers**

| <b>Biomarker</b>                  | <b>Significant change (95% CI), SUVR</b> |
|-----------------------------------|------------------------------------------|
| CSF A $\beta$ 40                  | 0.496 (0.452 - 0.539)                    |
| Plasma A $\beta$ 42               | 0.537 (0.481 - 0.592)                    |
| CSF A $\beta$ 42                  | 0.597 (0.582 - 0.611)                    |
| Plasma P-tau                      | 0.640 (0.575 - 0.706)                    |
| CSF A $\beta$ 42/40               | 0.647 (0.641 - 0.654)                    |
| Plasma A $\beta$ 42/40            | 0.680 (0.644 - 0.716)                    |
| CSF NfL (early inflection point)  | 0.697 (0.677 - 0.718)                    |
| Plasma NfL                        | 0.706 (0.563 - 0.849)                    |
| CSF P-tau                         | 0.718 (0.678 - 0.757)                    |
| CSF T-tau                         | 0.739 (0.701 - 0.778)                    |
| Plasma T-tau                      | 0.762 (0.622 - 0.902)                    |
| CSF Neurogranin                   | 0.804 (0.767 - 0.841)                    |
| Hippocampus / intracranial volume | 0.813 (0.744 - 0.882)                    |
| CSF YKL-40                        | 0.813 (0.711 - 0.915)                    |
| CSF NfL (late inflection point)   | 1.13 (1.11 - 1.15)                       |

Ordered by point on the x-axis (SUVR, see Fig. 1-2). Significant biomarker change was defined as a change of 2 SE from the starting point (left) of the curve. CSF NfL had two distinct inflections (see Fig. 1) and, therefore, two inflection points were calculated. The models for plasma A $\beta$ 40 and plasma neurogranin were not significant and thus not included in this inflection analysis. CSF A $\beta$ 42, A $\beta$ 40, T-tau and P-tau were here analyzed with the Elecsys assay.

Acronyms: NfL, neurofilament light chain; SE, standard error (in this case the standard deviation of the means from the 500 bootstrap samples); SUVR, standardized uptake value ratio.

**Appendix Table S2. Performance of the CSF p-tau217 and p-tau181 assays.**

| <b>Sample</b>         | <b>Mean concentration, pg/ml</b> | <b>SD</b> | <b>N</b> | <b>% CV</b> |
|-----------------------|----------------------------------|-----------|----------|-------------|
| <b>CSF P-tau217</b>   |                                  |           |          |             |
| 10 pg/mL QC           | 9.97                             | 0.59      | 22       | 5.95        |
| 50 pg/mL QC           | 44.31                            | 2.06      | 22       | 4.66        |
| High Control Sample   | 737.99                           | 40.96     | 22       | 5.55        |
| Medium Control Sample | 328.72                           | 17.81     | 22       | 5.42        |
| Low Control Sample    | 59.69                            | 4.93      | 22       | 8.26        |
| <b>CSF P-tau181</b>   |                                  |           |          |             |
| 10 pg/mL QC           | 9.49                             | 0.24      | 22       | 2.53        |
| 50 pg/mL QC           | 45.84                            | 1.05      | 22       | 2.29        |
| High Control Sample   | 379.61                           | 21.25     | 22       | 5.60        |
| Medium Control Sample | 190.27                           | 7.29      | 22       | 3.83        |
| Low Control Sample    | 71.19                            | 3.92      | 22       | 5.51        |

CV, coefficient of variation; QC, quality control; SD, standard deviation.

# Appendix Figures

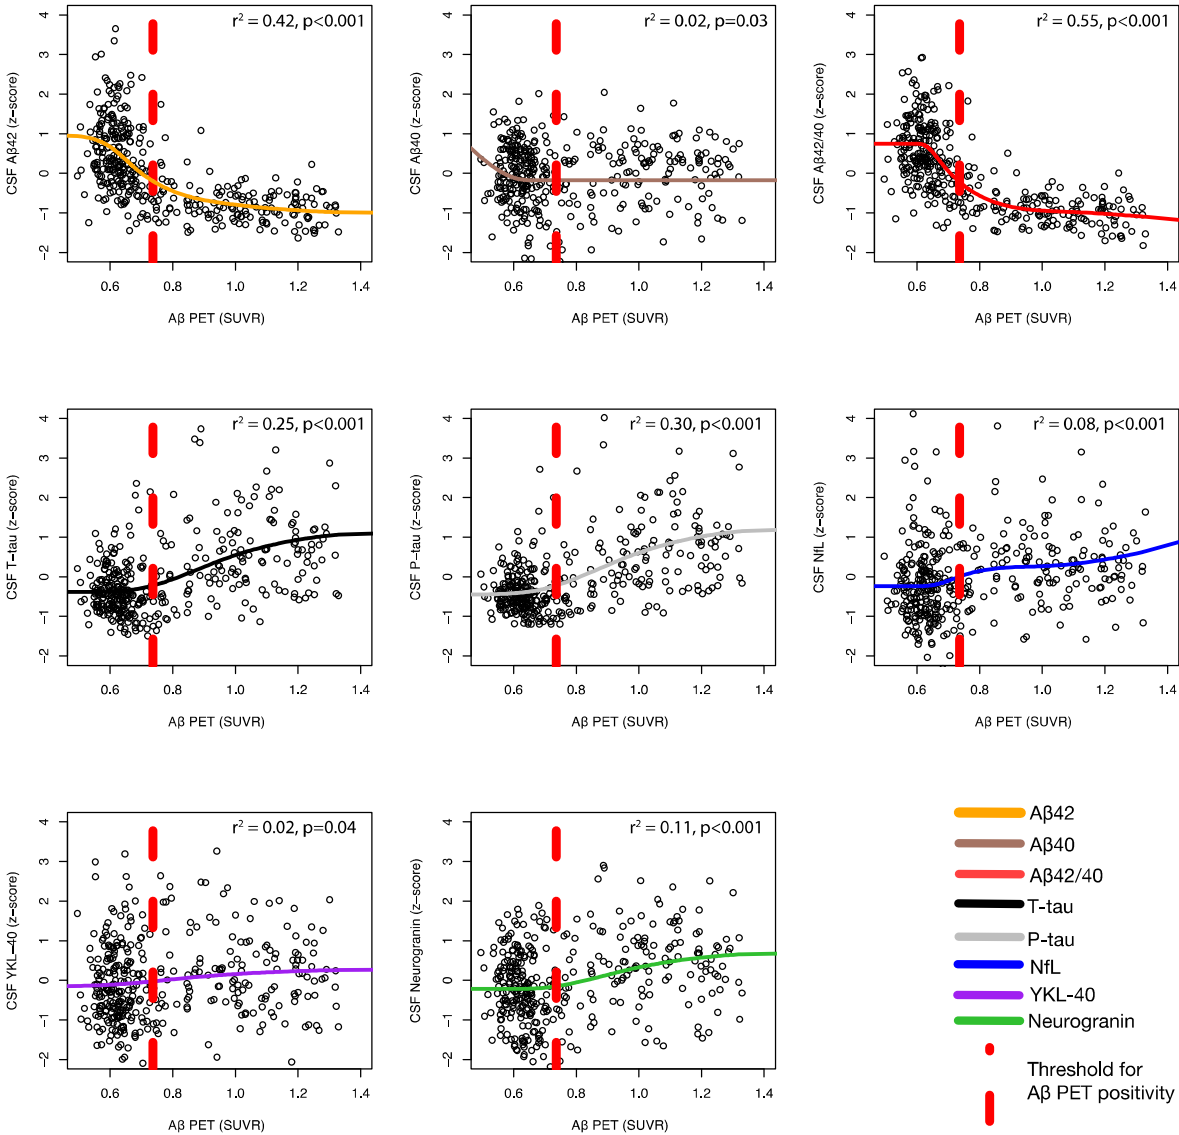

**Appendix Figure S1. Monotone spline models of the CSF biomarker trajectories.**

P- and  $r^2$  values of the spline models are shown in the upper right corner. One Aβ PET outlier with a SUVR of 1.6959 is not shown in the Figure. Further, the following participants outside the range of the y axis are not shown (x, y coordinates): Aβ40 (1.32, 11.8), NfL (0.79, 4.44), T-tau (1.19, 5.86 and 1.23, 5.76), and P-tau (1.23, 5.81; 1.19, 5.77; and 0.87, 5.04).

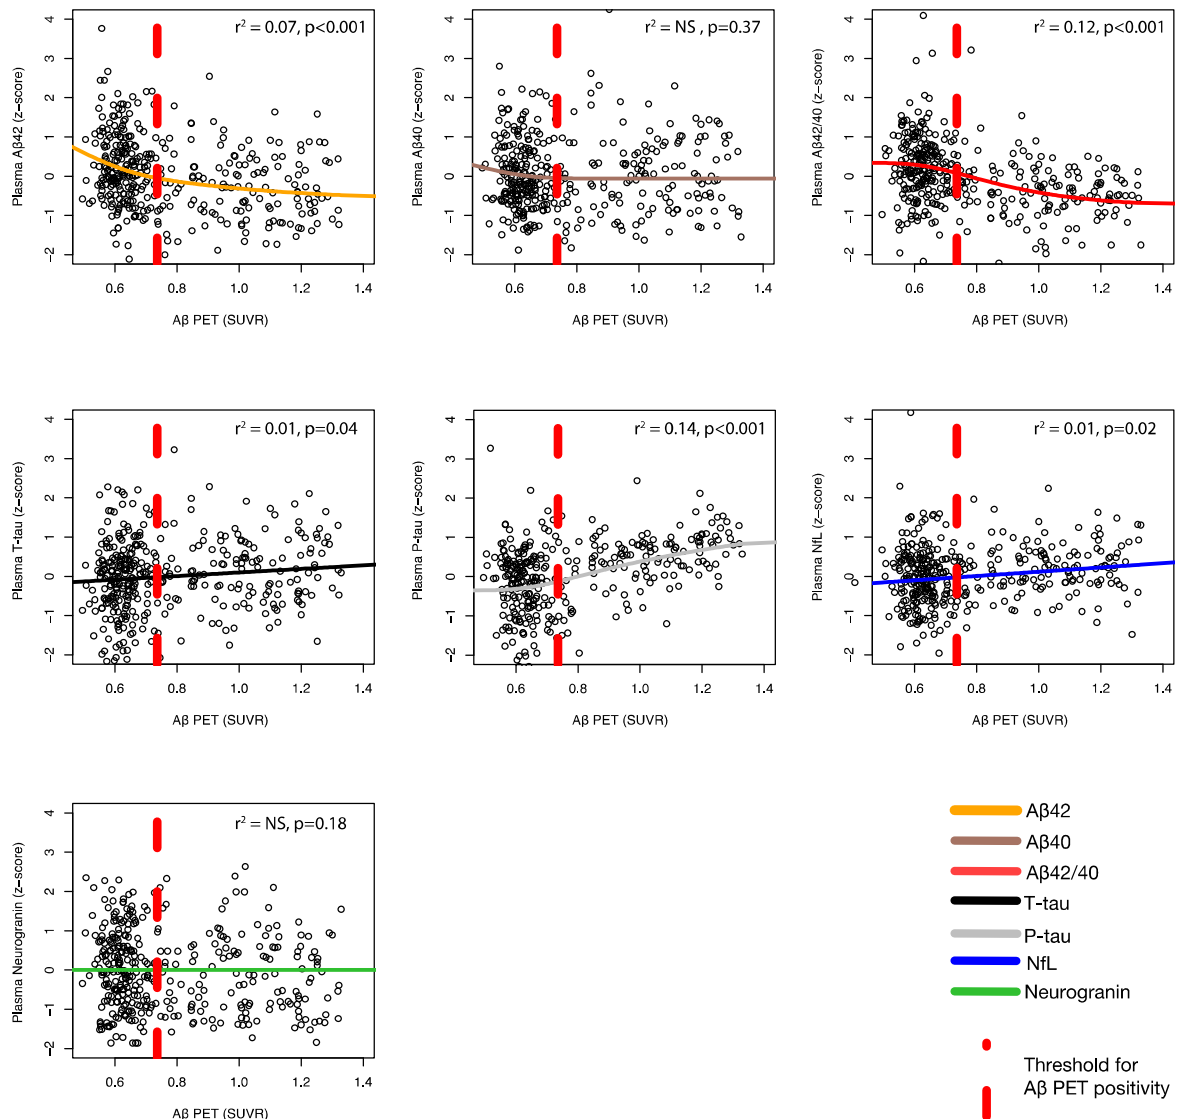

## Appendix Figure S2. Monotone spline models of the plasma biomarker trajectories.

P- and  $r^2$  values of the models are shown in the upper right corner. One A $\beta$  PET outlier with a SUVR of 1.6959 is not shown in the Figure. Further, the following participants outside the range of the y axis are not shown (x, y coordinates): A $\beta$ 42 (7 participants between -2.39 to -4.26, 0.61 to 1.19), A $\beta$ 40 (5 participants between -3.02 to -2.37, and 1 at 0.55, 5.48), A $\beta$ 42/A $\beta$ 40 (6 participants between -2.17 to -4.53, 1 at 0.85, 4.69; and 1 at 0.61, 6.08), T-tau (5 participants between -2.53 to -2.85 and 1 at 0.55, 4.47); P-tau (7 participants between -3.98 to -2.31), NfL (1 at 0.57, -10.8; and 3 between 0.64 to 0.99, -4.06 to 4.96).
